# Supplementary material
Source: publisher site journal article supplement (https://www.dovepress.com/article/518218)
Supplement: Supplementary file 1 [file 518218%20revised%20supplementary%20materials.docx]

**Table S1** P value of correlation heatmap of COTE

| Characteristics | COTE | Hospitalization | AE Events | mMRC | CAT | FEV1 | FEV1% | FEV1/FVC | MEF75/25% | HGB | BNP | HbA1c | Age | BMI |
| --- | --- | --- | --- | --- | --- | --- | --- | --- | --- | --- | --- | --- | --- | --- |
| COTE |  |  |  |  |  |  |  |  |  |  |  |  |  |  |
| Hospitalization | 0 |  |  |  |  |  |  |  |  |  |  |  |  |  |
| AE Events | 0 | 0 |  |  |  |  |  |  |  |  |  |  |  |  |
| mMRC | 0 | 0 | 0 |  |  |  |  |  |  |  |  |  |  |  |
| CAT | 0 | 0 | 0 | 0 |  |  |  |  |  |  |  |  |  |  |
| FEV1 | 0 | 0.162 | 0.057 | 0.109 | 0.062 |  |  |  |  |  |  |  |  |  |
| FEV1% | 0 | 0 | 0 | 0 | 0 | 0 |  |  |  |  |  |  |  |  |
| FEV1/FVC | 0 | 0 | 0 | 0 | 0 | 0 | 0 |  |  |  |  |  |  |  |
| MEF75/25% | 0.034 | 0.766 | 0.632 | 0.476 | 0.616 | 0 | 0 | 0 |  |  |  |  |  |  |
| HGB | 0.001 | 0.349 | 0.545 | 0.941 | 0.992 | 0 | 0.691 | 0.343 | 0.321 |  |  |  |  |  |
| BNP | 0.022 | 0.676 | 0.755 | 0.871 | 0.398 | 0.319 | 0.222 | 0.113 | 0.823 | 0 |  |  |  |  |
| HbA1c | 0.004 | 0.707 | 0.787 | 0.163 | 0.262 | 0.013 | 0.98 | 0.86 | 0.355 | 0.054 | 0.099 |  |  |  |
| Age | 0 | 0.368 | 0.618 | 0.301 | 0.144 | 0 | 0.054 | 0.001 | 0.832 | 0 | 0 | 0.205 |  |  |
| BMI | 0.023 | 0.005 | 0.007 | 0.002 | 0.001 | 0.094 | 0.076 | 0 | 0.113 | 0.002 | 0.009 | 0 | 0.126 |  |

**Notes:**

**Abbreviations:** COTE, chronic obstructive pulmonary disease specific comorbidity test index; AE Events, acute exacerbation events; mMRC, modified British medical research council; CAT,chronic obstructive pulmonary disease assessment test; FEV1 , forced expiratory volume in one second; FEV1%, the percent predicted of forced expiratory volume in one second; FEV1/FVC, forced expiratory volume in one second / forced vital capacity; MEF75/25% , maximal expiratory flow at 25%-75% of the FVC has not been exhaled; HGB, hemoglobin; BNP, B-type natriuretic peptide; HbA1c, glycated hemoglobin; BMI, body mass index.

**Table S2** Blood test and lung function between Pulmonary and Extrapulmonary comorbidities group

| Characteristics | Pulmonary comorbidities group=124 | Extrapulmonary comorbidities group=189 | χ²/t/Z | P |
| --- | --- | --- | --- | --- |
| Blood test |  |  |  |  |
| WBC (×109/L) | 7.79±3.22 | 7.54±2.98 | 0.70 | 0.483 |
| NE% (%) | 68.37±11.73 | 69.17±12.10 | -0.58 | 0.565 |
| NE (×109/L) | 4.59 (2.84, 6.62) | 4.33 (3.08, 6.16) | 0.63 | 0.528 |
| EOS% (%) | 1.60 (1.10, 2.58) | 1.20 (0.44, 2.20) | 3.98 | <0.001 |
| EOS (×109/L) | 0.19 (0.12, 0.28) | 0.10 (0.04, 0.17) | 6.88 | <0.001 |
| HGB (g/L) | 129.02±18.65 | 125.92±18.23 | 1.46 | 0.145 |
| BNP (pg/ml) | 55.00 (25.00, 124.75) | 60.00 (28.50, 173.00) | -1.49 | 0.136 |
| ALB (g/L) | 36.84±5.16 | 37.10±3.98 | -0.45 | 0.650 |
| TG (mmol/L) | 1.11 (0.77, 1.59) | 1.08 (0.74, 1.65) | 0.26 | 0.792 |
| TC (mmol/L) | 4.30±0.81 | 4.12±1.07 | 1.72 | 0.087 |
| LDL (mmol/L) | 2.48±0.71 | 2.30±0.85 | 1.93 | 0.054 |
| HDL (mmol/L) | 1.15 (0.91, 1.38) | 1.12 (0.91, 1.40) | 0.47 | 0.637 |
| HbA1c (%) | 6.00 (5.70, 6.40) | 6.10 (5.80, 6.75) | -0.93 | 0.352 |
| FeNO (ppb) | 30.50 (13.50, 68.00) | 27.00 (13.00, 56.50) | 1.50 | 0.133 |
| Lung function |  |  |  |  |
| FEV1 (L) | 1.24 (1.02, 1.72) | 1.26 (1.01, 1.61) | -0.67 | 0.505 |
| FEV1%pred (%) | 58.60 (43.57, 76.38) | 49.70 (43.10, 65.65) | 1.77 | 0.077 |
| FEV1/FVC (%) | 57.26 (50.83, 64.58) | 56.04 (46.49, 63.01) | 1.79 | 0.073 |
| MEF50% (%) | 26.18 (15.35, 37.38) | 27.30 (18.22, 37.57) | -1.11 | 0.266 |
| MEF25% (%) | 27.90 (18.09, 41.16) | 28.41 (19.79, 40.92) | -0.65 | 0.515 |
| MEF75/25% (%) | 23.07 (17.28, 33.28) | 24.90 (17.14, 34.73) | -0.96 | 0.334 |
| DLCO (%) | 61.05 (6.53, 84.10) | 58.40 (6.30, 81.45) | 0.15 | 0.885 |

**Notes:**

**Abbreviations:** WBC, white blood cell; NE%, percentage of neutrophils NE, neutrophils; EOS%, percentage of eosinophils; EOS, eosinophil; HGB, hemoglobin; BNP, B-type natriuretic peptide; ALB, albumin; TG, triglyceride; TC, total cholesterol; LDL, low-density lipoprotein; HDL, high-density lipoprotein; HbA1c, glycated hemoglobin; FeNO, fractional exhaled nitric oxide; FEV1 , forced expiratory volume in one second; FEV1%pred, the percent predicted of forced expiratory volume in one second; FEV1/FVC, forced expiratory volume in one second / forced vital capacity; MEF50% , maximal expiratory flow at 50% of the FVC has not been exhaled; MEF25% , maximal expiratory flow at 25% of the FVC has not been exhaled; MEF75/25% , maximal expiratory flow at 25%-75% of the FVC has not been exhaled; DLCO, diffusing capacity of the lungs for carbon monoxide.

**Figure S1** Lasso regression of moderate-to-severe acute exacerbation in COPD

**
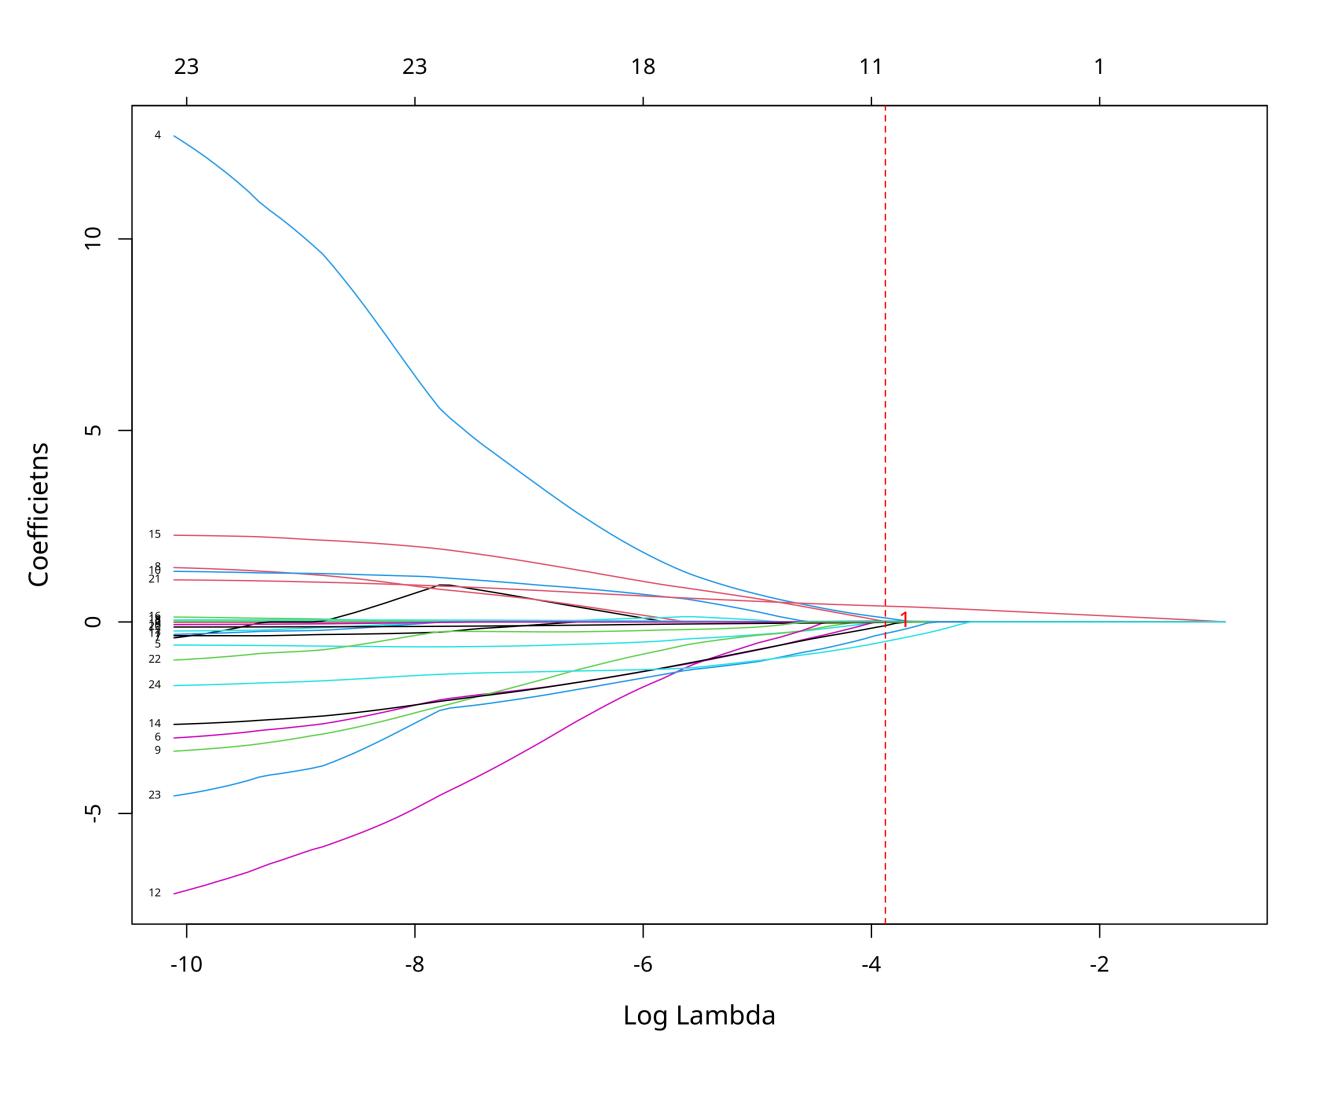
**

**Figure S2** Lasso regression of moderate-to-severe acute exacerbation in COPD

**
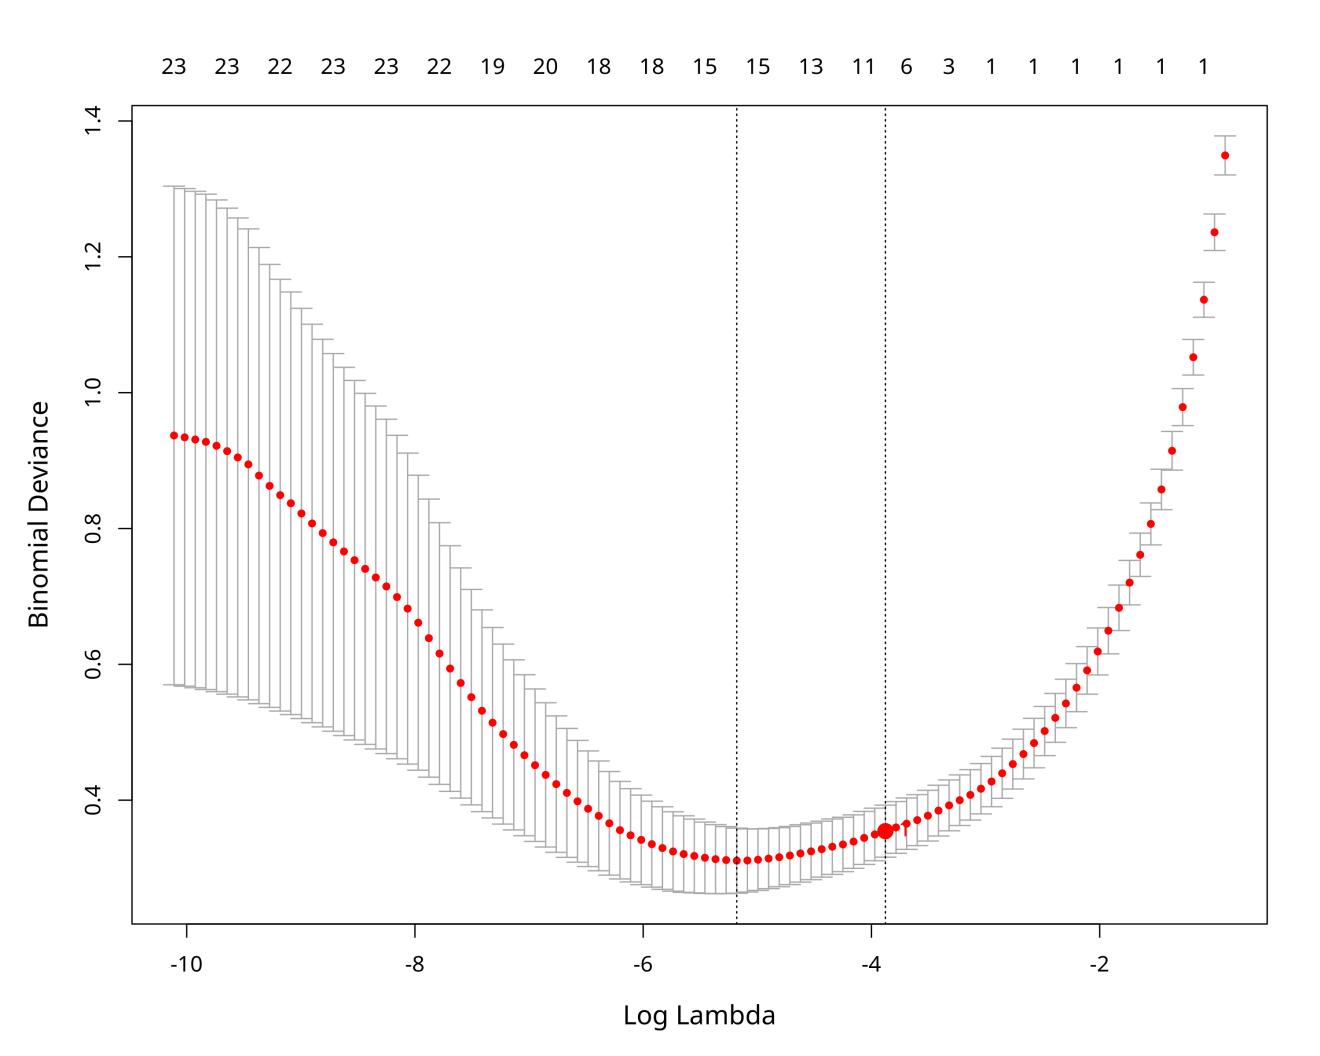
**

**Figure S3** calibration curve of train set of moderate-to-severe acute exacerbation in COPD

**
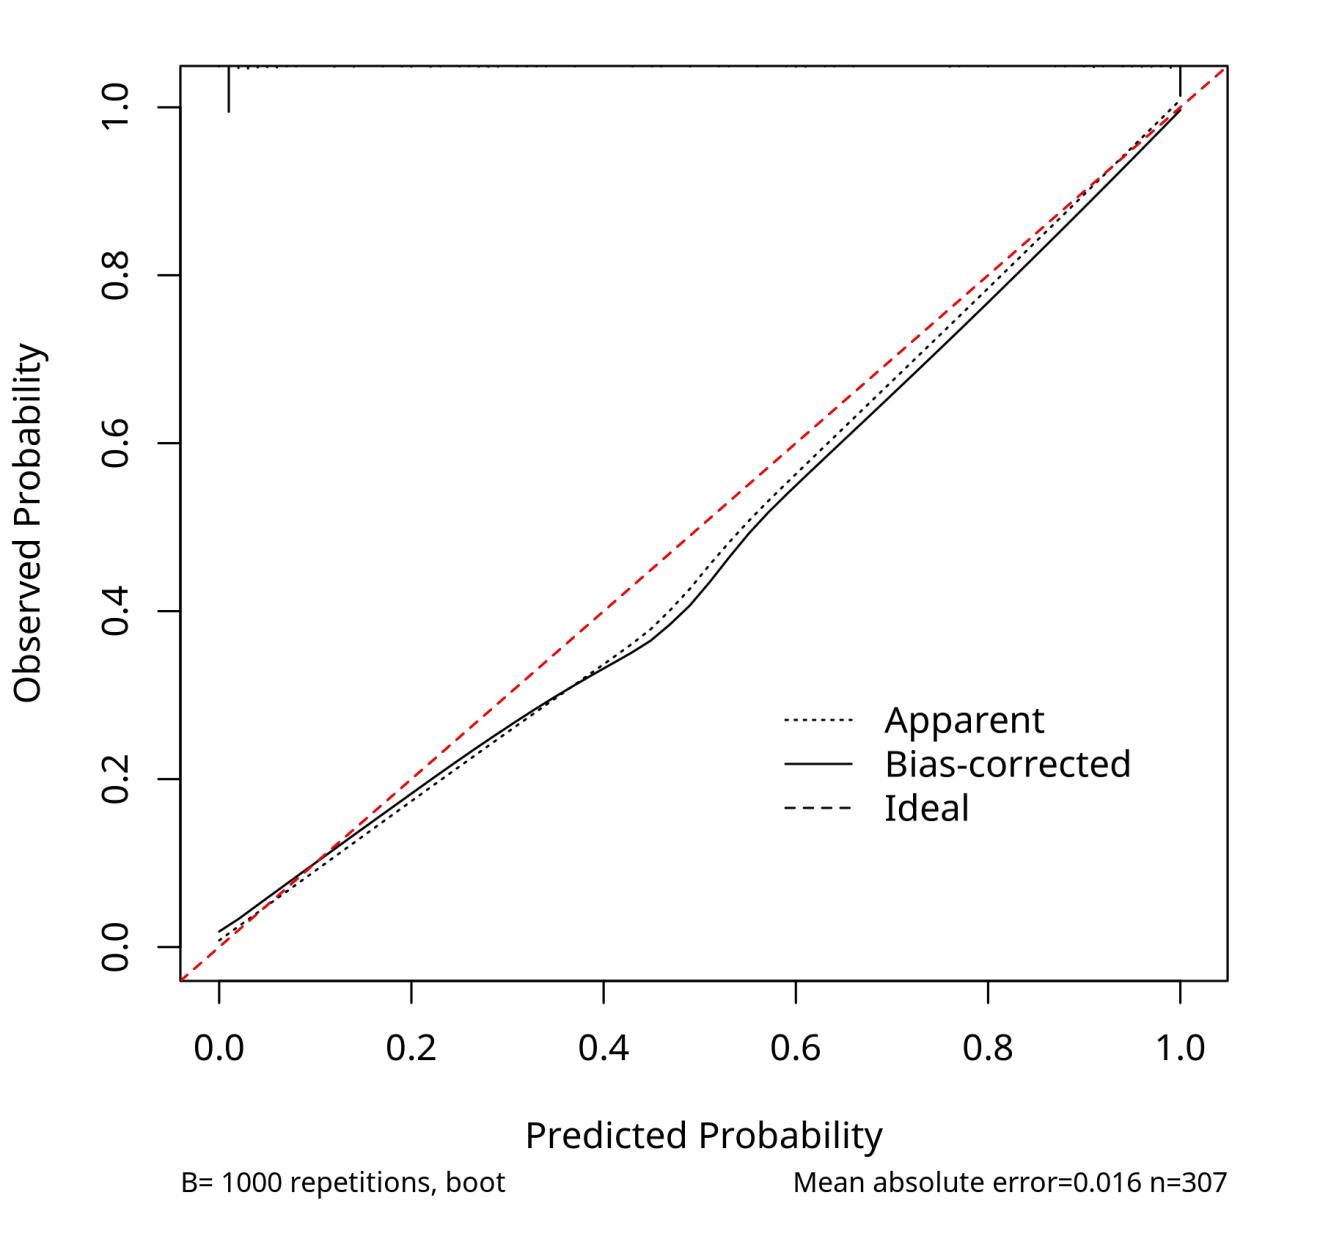
**

**Figure S4** calibration curve of validation set of moderate-to-severe acute exacerbation in COPD

**
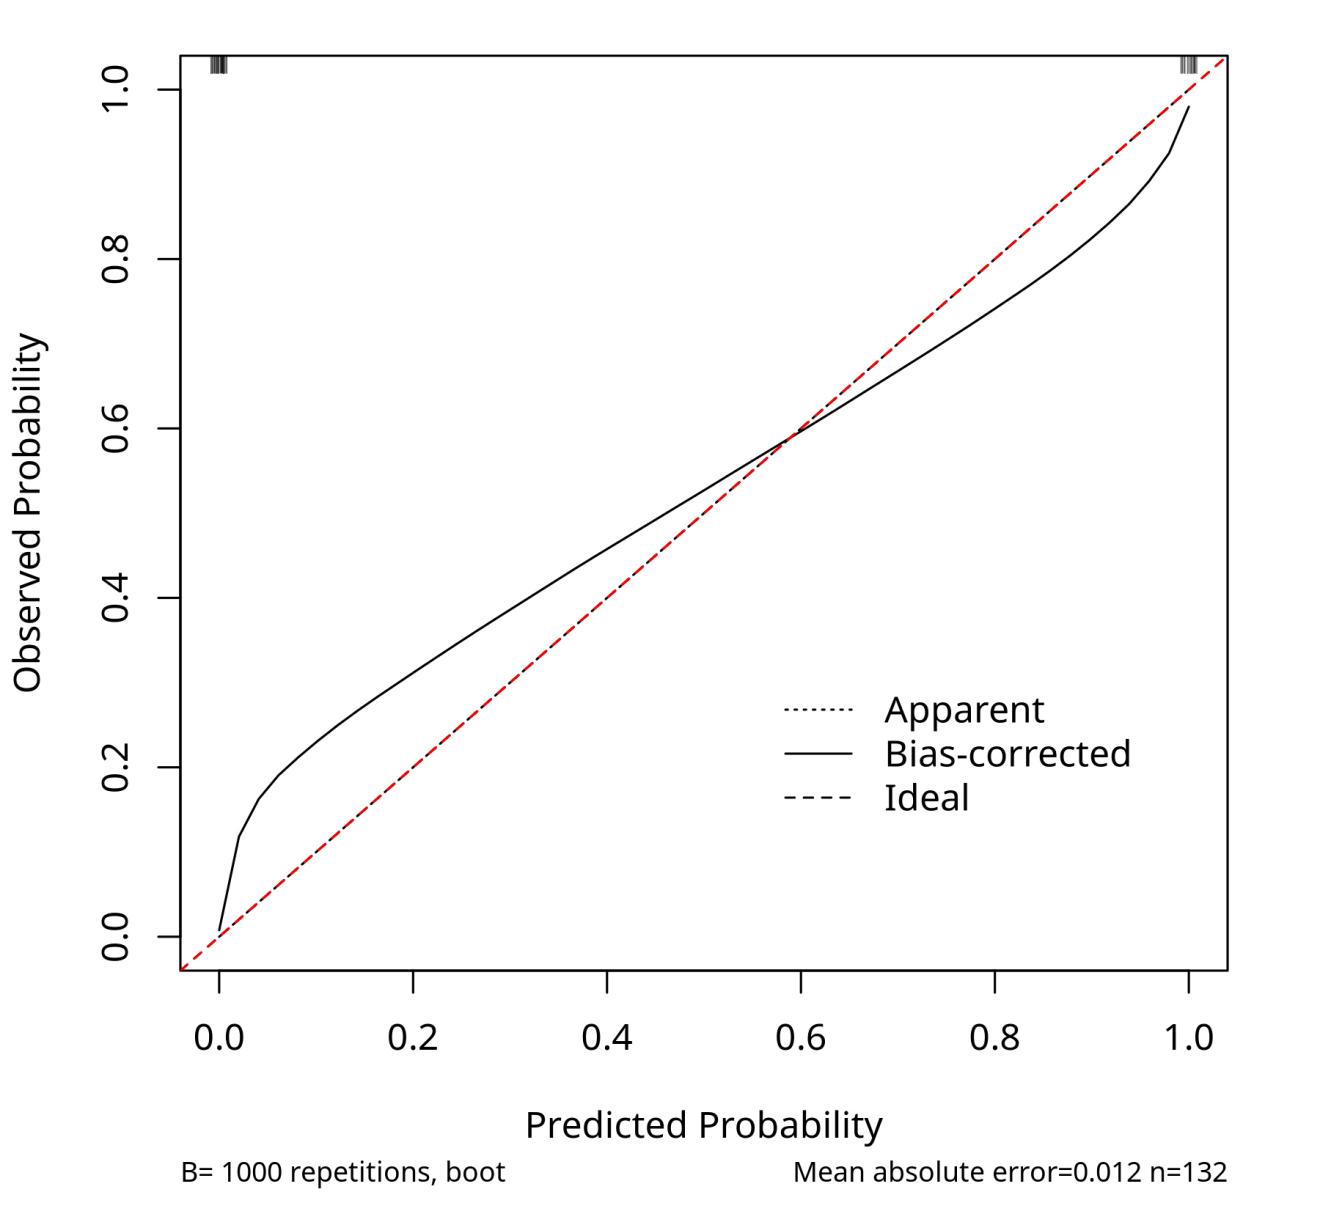
**

**Figure S5** DCA of train set of moderate-to-severe acute exacerbation in COPD

**
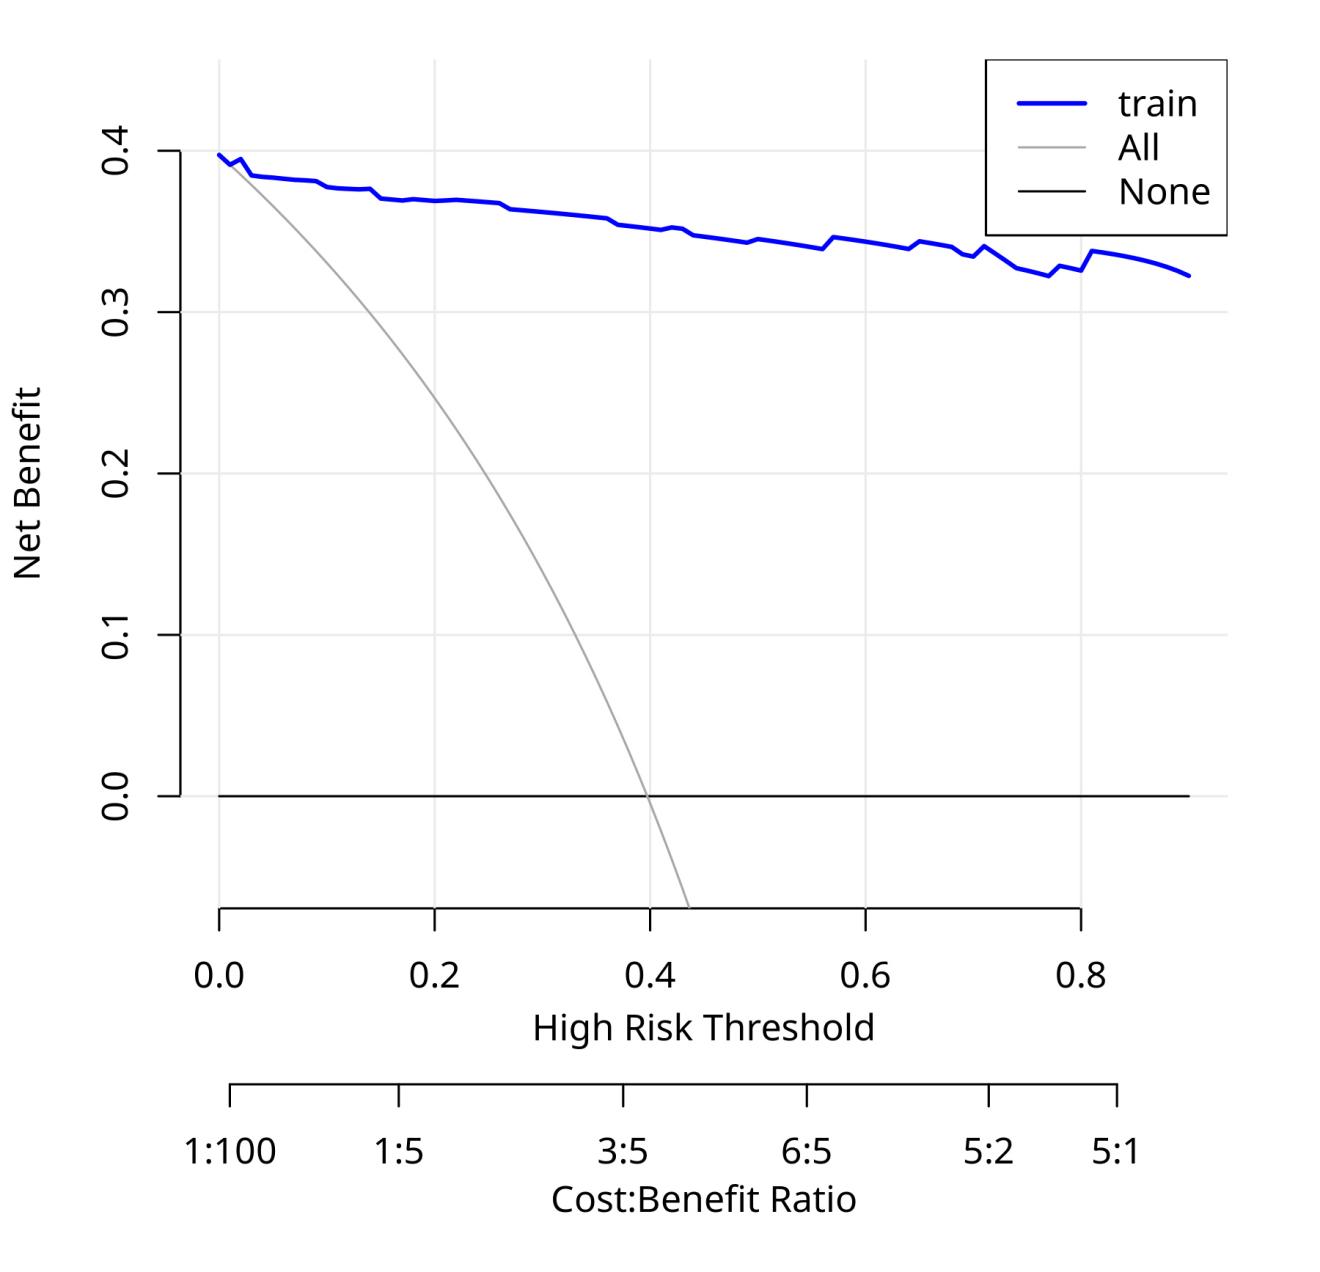
**

**Figure S6** DCA of validation set of moderate-to-severe acute exacerbation in COPD

**
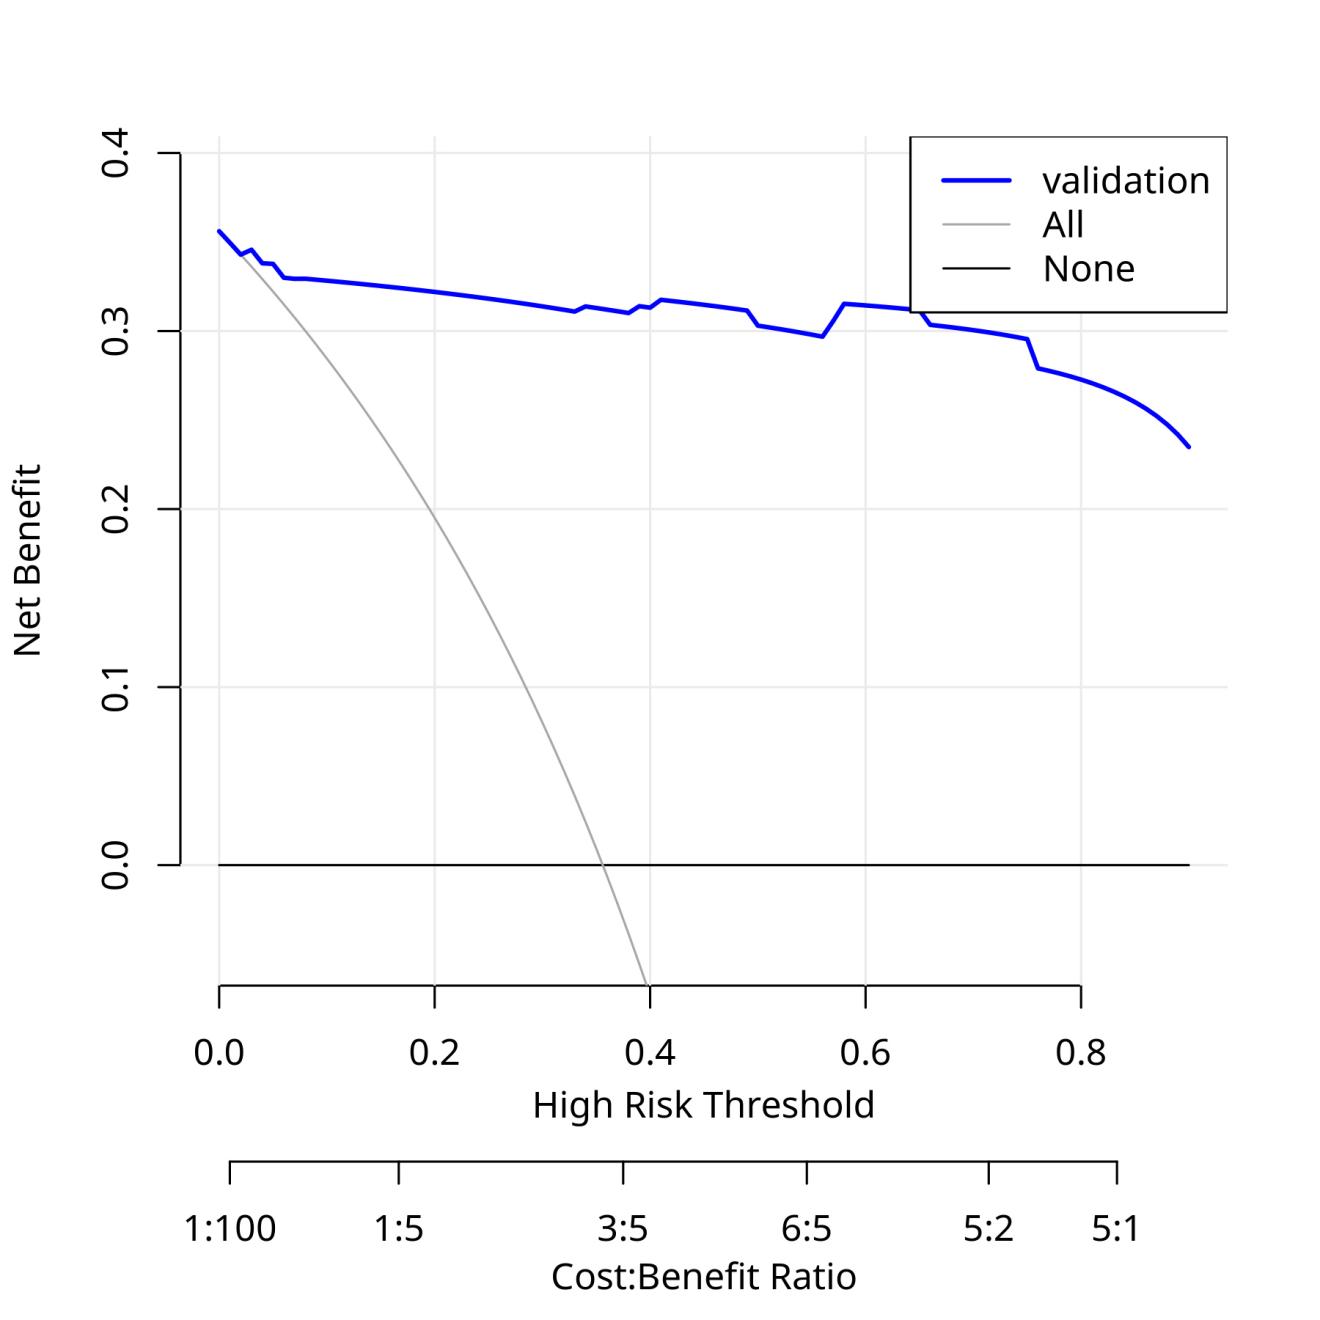
**

**Figure S7** Lasso regression of hospitalization in COPD

**
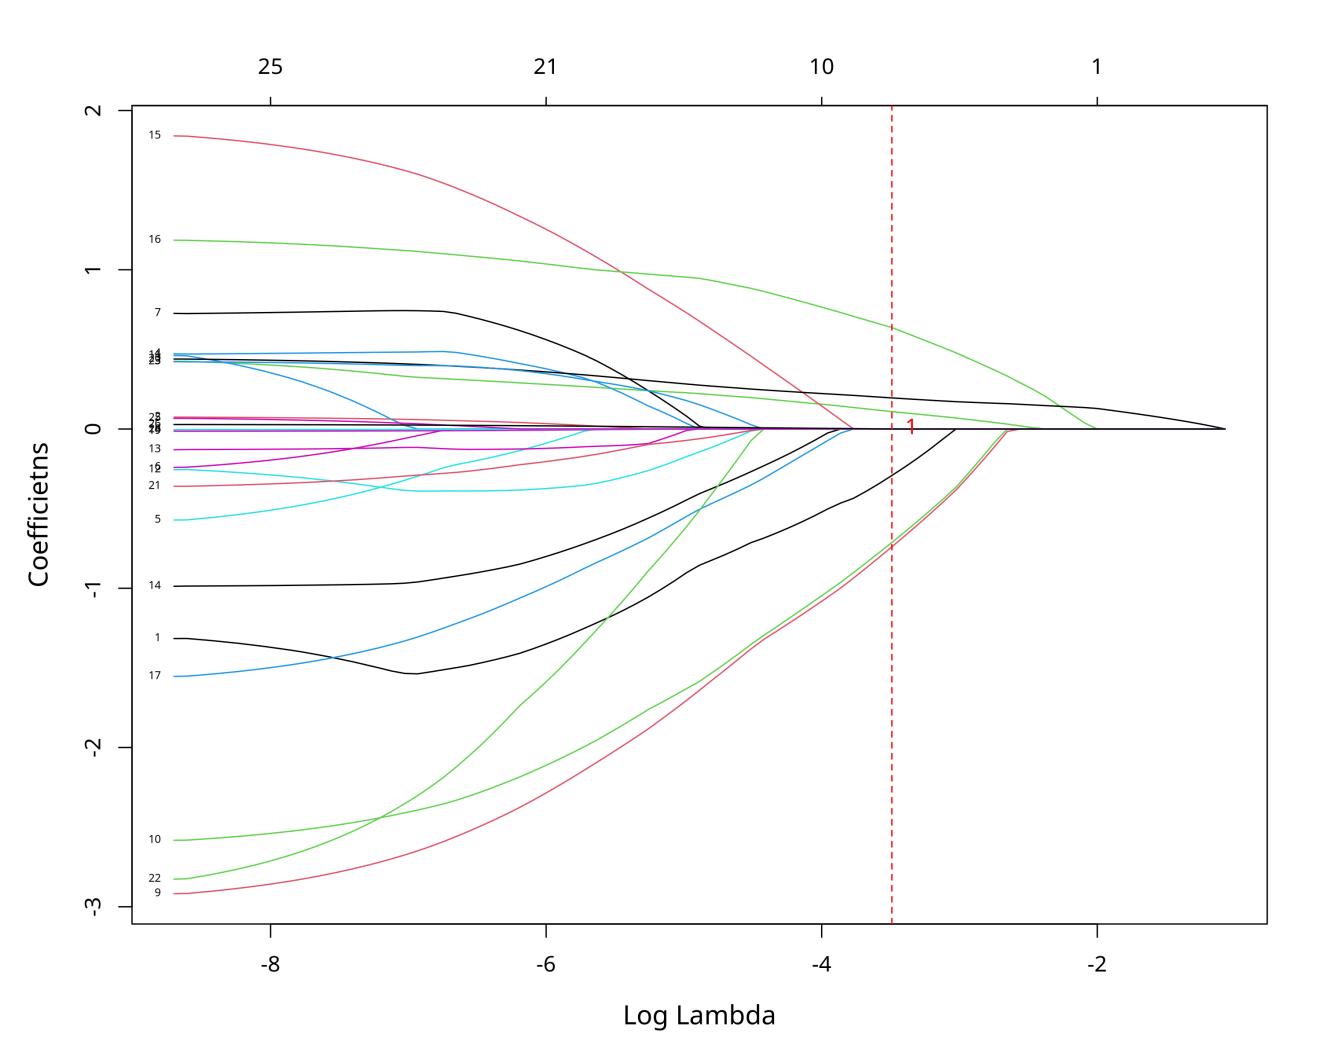
**

**Figure S8** Lasso regression of hospitalization in COPD

**
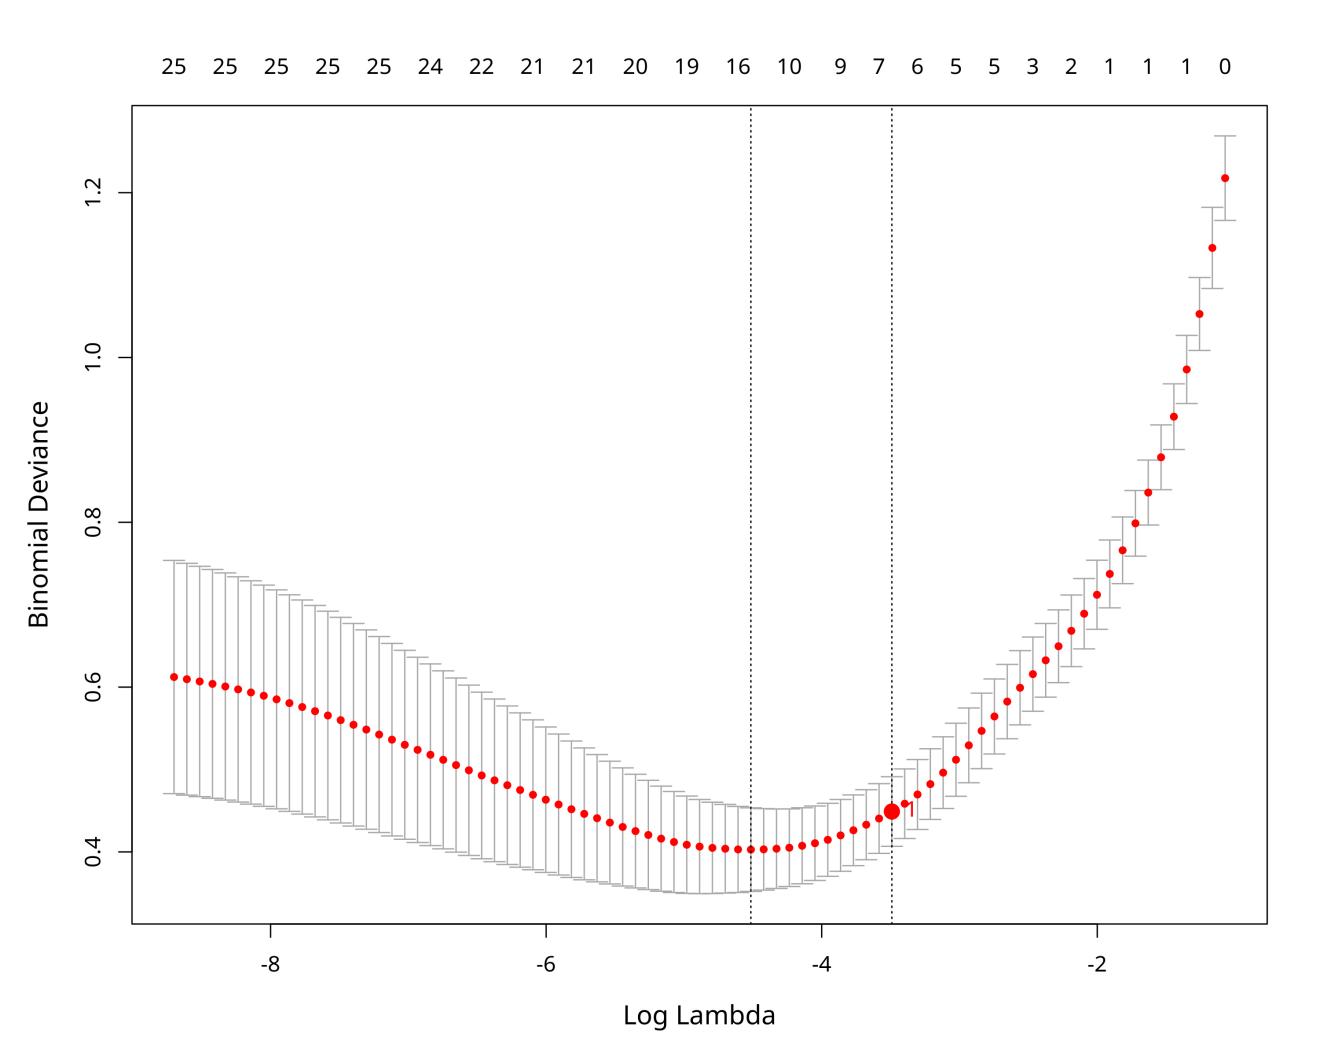
**

**Figure S9** calibration curve of train set of hospitalization in COPD

**
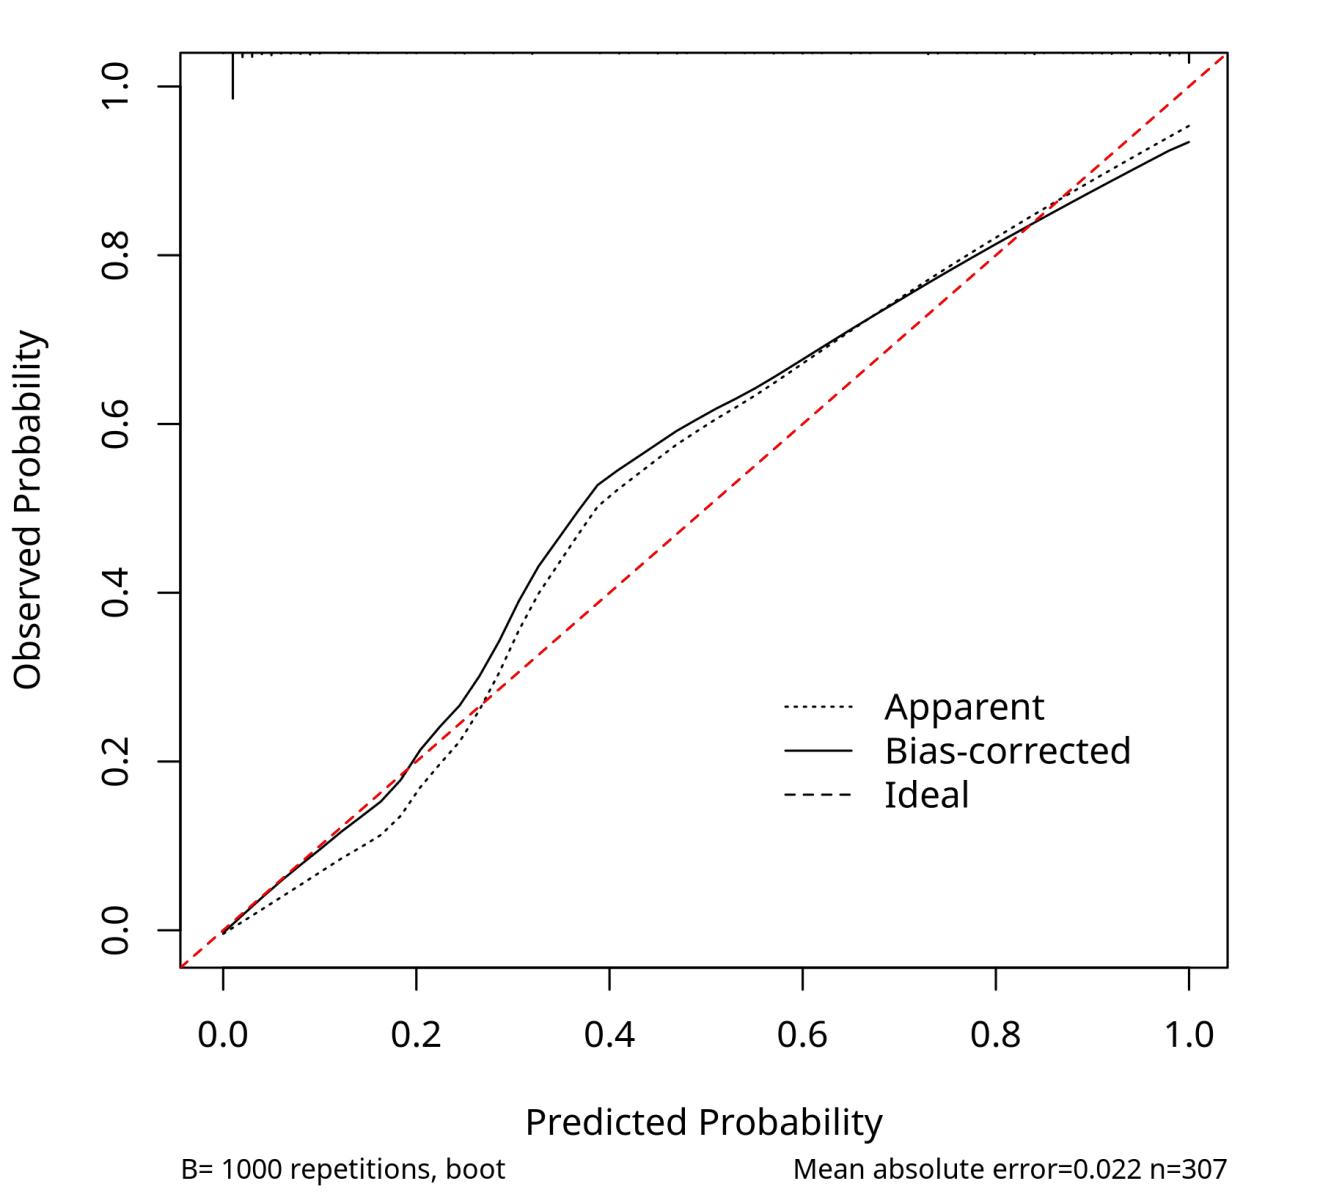
**

**Figure S10** calibration curve of train set of hospitalization in COPD

**
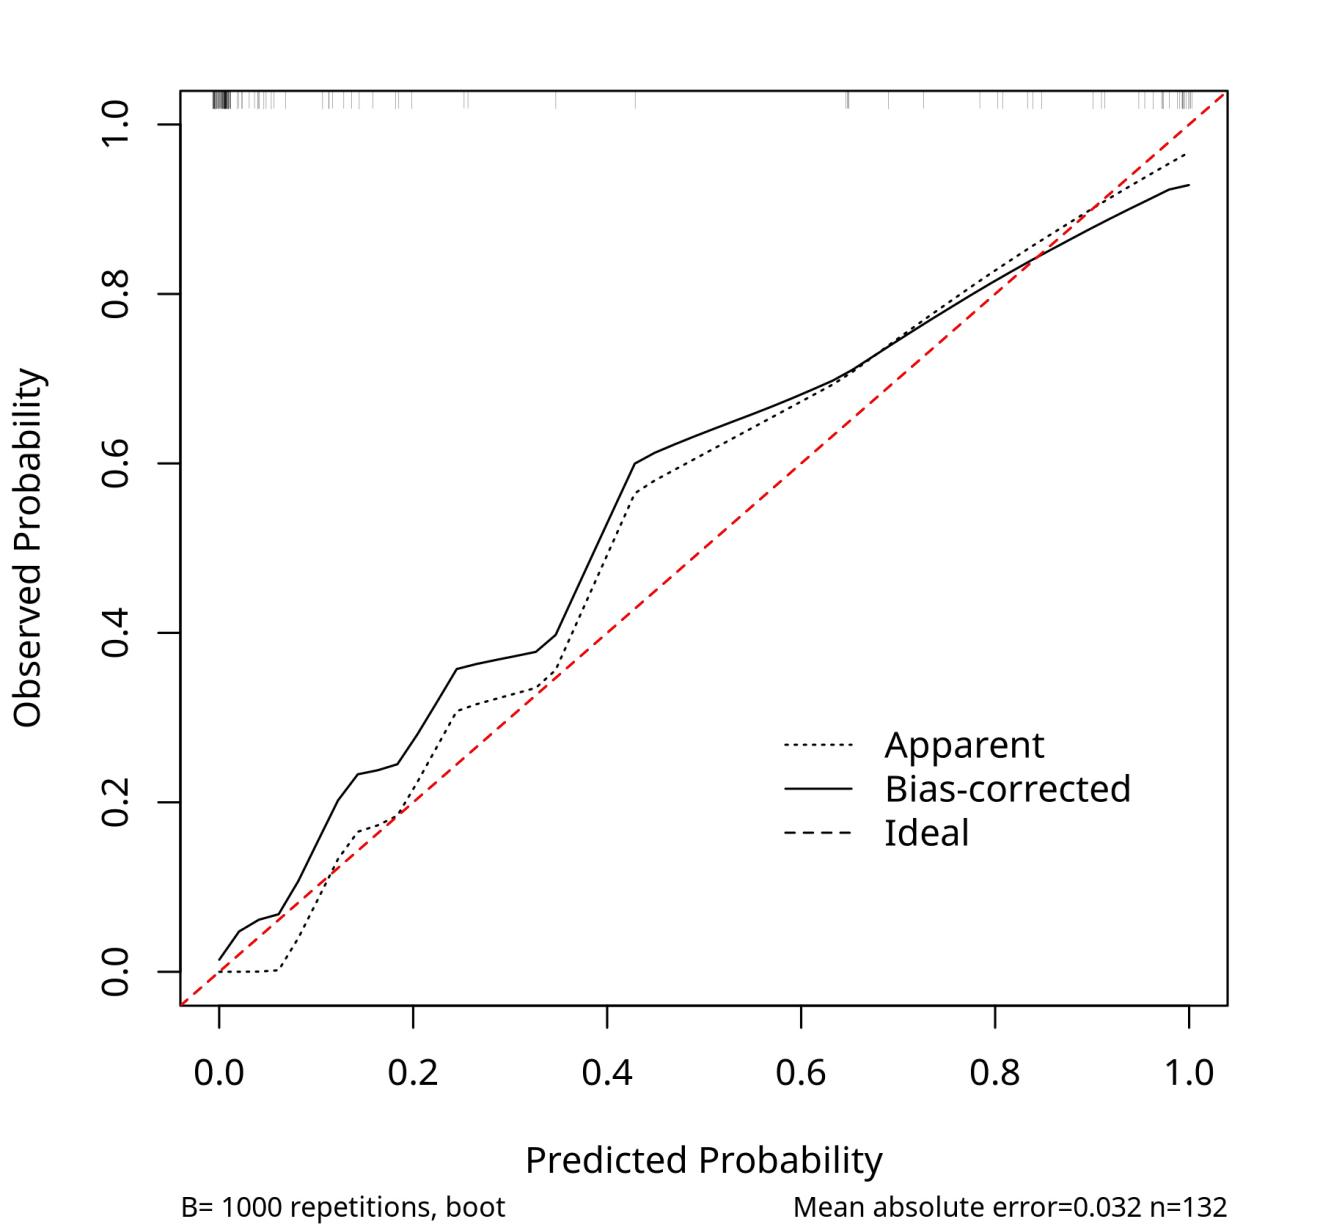
**

**Figure S11** DCA of train set of hospitalization in COPD

**
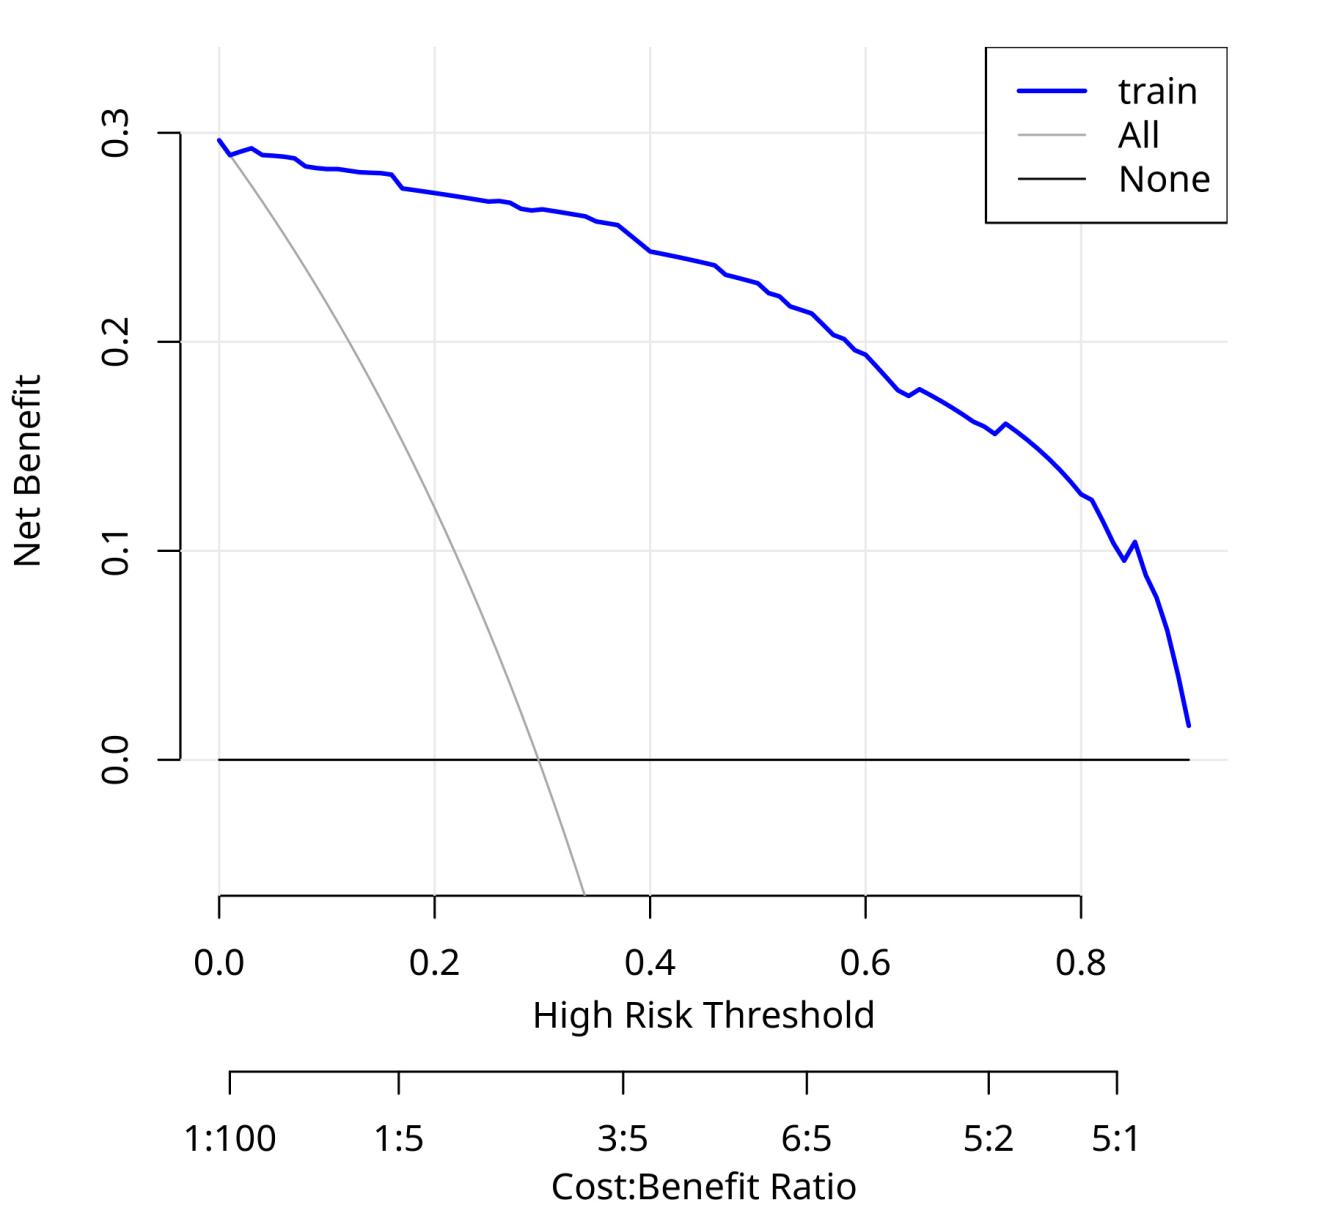
**

**Figure S12** DCA of validation set of hospitalization in COPD

**
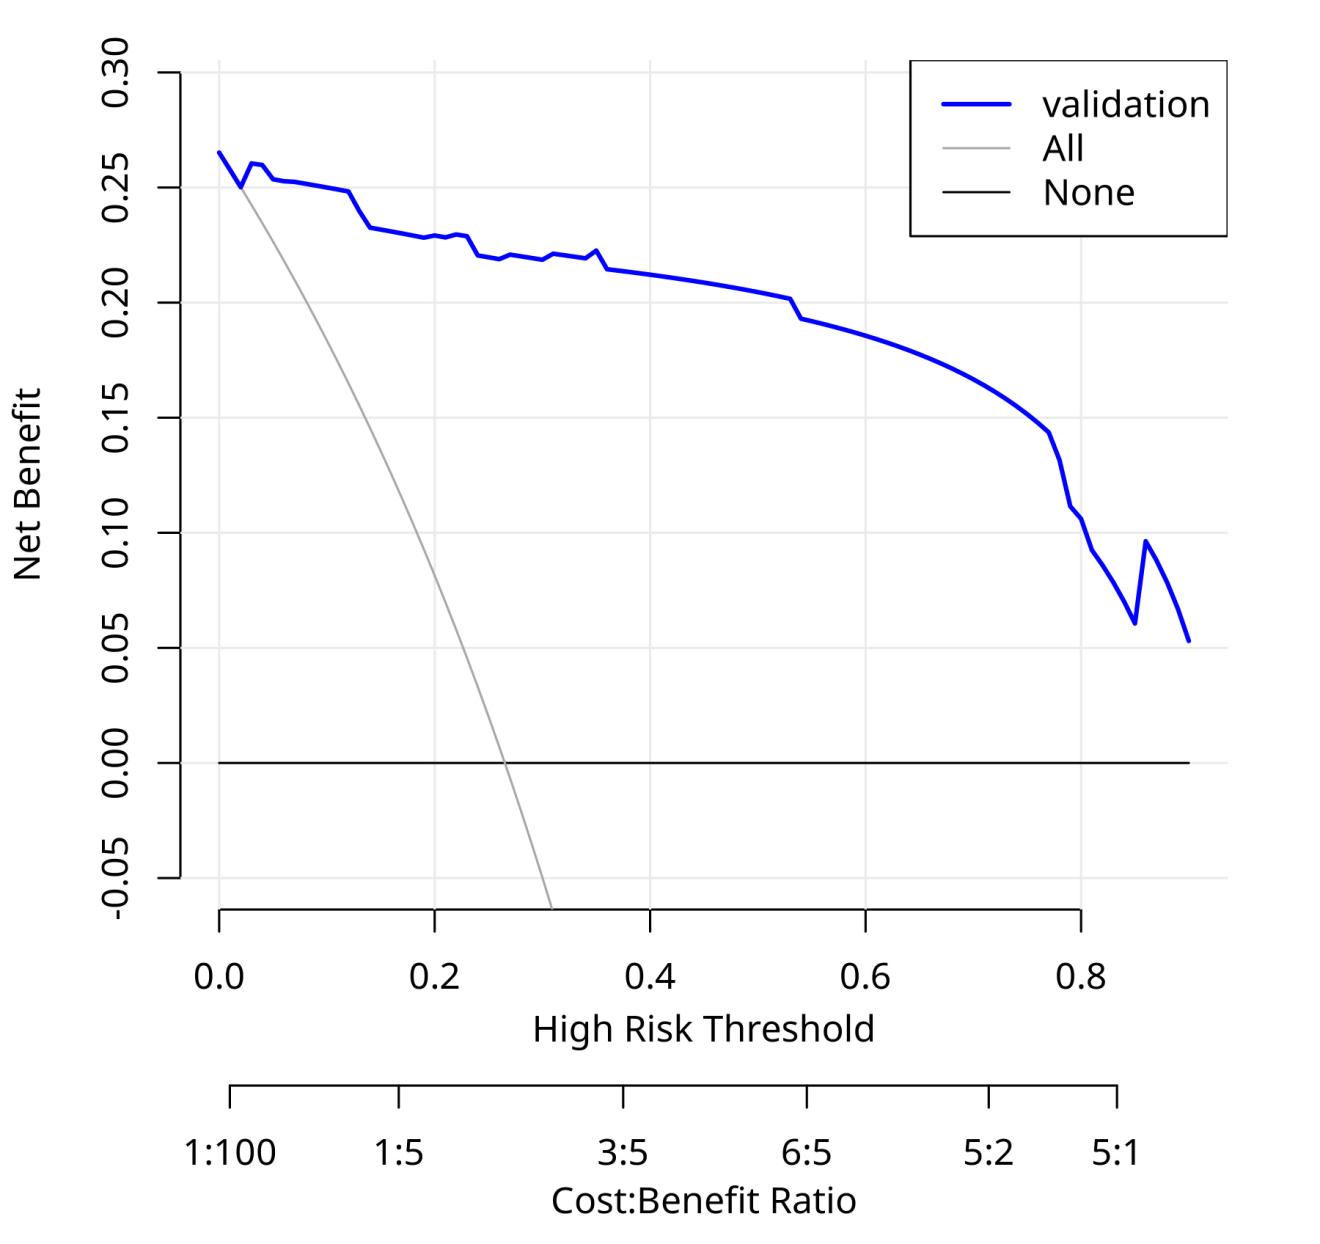
**
